# Supplementary material for: An intense NIR emission from Ca14Al10Zn6O35:Mn4+,Yb3+via energy transfer for solar spectral converters
Source: Royal Society of Chemistry journal article supplement (doi:10.1039/c5dt03465e), 2015-11-17
Supplement: c5dt03465e1.pdf [file c5dt03465e1.pdf]

Supporting information

**An intense NIR emission from  $\text{Ca}_{14}\text{Al}_{10}\text{Zn}_6\text{O}_{35}:\text{Mn}^{4+},\text{Yb}^{3+}$  via energy transfer for solar spectral convertor**

Wei Lü<sup>a,\*</sup>, Mengmeng Jiao<sup>a,b</sup>, Baiqi Shao<sup>a,b</sup>, Lingfei Zhao<sup>a,b</sup>, Yang Feng<sup>a,b</sup> and Hongpeng You<sup>a,\*</sup>

*<sup>a</sup>State key Laboratory of Rare Earth Resource Utilization, Changchun Institute of Applied Chemistry, Chinese Academy of Sciences, Changchun 130022, P. R. China.*

*<sup>b</sup>University of the Chinese Academy of Sciences, Beijing 100049, P. R. China.*

## Experimental Section

**Synthesis.** The  $\text{Ca}_{14-x}\text{Al}_{9.85}\text{Zn}_6\text{O}_{35}(\text{CAZO}):0.15\text{Mn}^{4+},x\text{Yb}^{3+}$  (abbreviated as  $\text{CAZO}:\text{Mn}^{4+},x\text{Yb}^{3+}$ ;  $\text{Mn}^{2+}$  substitutes for  $\text{Al}^{3+}$ ,  $\text{Yb}^{3+}$  substitutes for  $\text{Ca}^{2+}$ , where the  $x$  is mole percent) phosphors were synthesized by a high-temperature solid-state reaction. The constituent oxides or carbonates  $\text{CaCO}_3$  (A. R.),  $\text{ZnO}$  (A. R.),  $\text{Al}_2\text{O}_3$  (A. R.),  $\text{MnCO}_3$  (A. R.) and  $\text{Yb}_2\text{O}_3$  (99.99%) were employed as the raw materials, which were mixed homogeneously by an agate mortar for 30 minutes, placed in a crucible with a lid, and then sintered in a tubular furnace at  $1220^\circ\text{C}$  for 4 h in air.

**Characterization.** The phase purity of all samples were identified by powder X-ray diffraction (XRD) analysis (Bruker AXS D8), with graphite monochromatized  $\text{Cu K}\alpha$  radiation ( $\lambda = 0.15405$  nm) operating at 40 kV and 40 mA. The morphology and size of the as-prepared samples were inspected with a field emission scanning electron microscope equipped with an energy-dispersive spectrometer (EDS) (FE-SEM, S-4800, Hitachi, Japan). High-resolution transmission electron microscopic (HRTEM) images were recorded with a FEI Tecnai G2 S-Twin with a field-emission gun operating at 200 kV and a Gatan multiplane CCD camera. Room-temperature photoluminescence (PL) spectra were measured on a Hitachi F-7000 luminescence spectrophotometer equipped with a 150 W xenon lamp as the excitation source. Absolute photoluminescence quantum yields (QYs) were measured by the absolute PL quantum yield measurement system (C9920-02, Hamamatsu Photonics K. K., Japan). The luminescence decay curves were obtained from a Lecroy Wave Runner 6100 digital oscilloscope (1GHz) using a tunable laser (pulse width = 4 ns, gate = 50 ns) as the excitation source (Continuum Sunlite OPO).

Figure S1

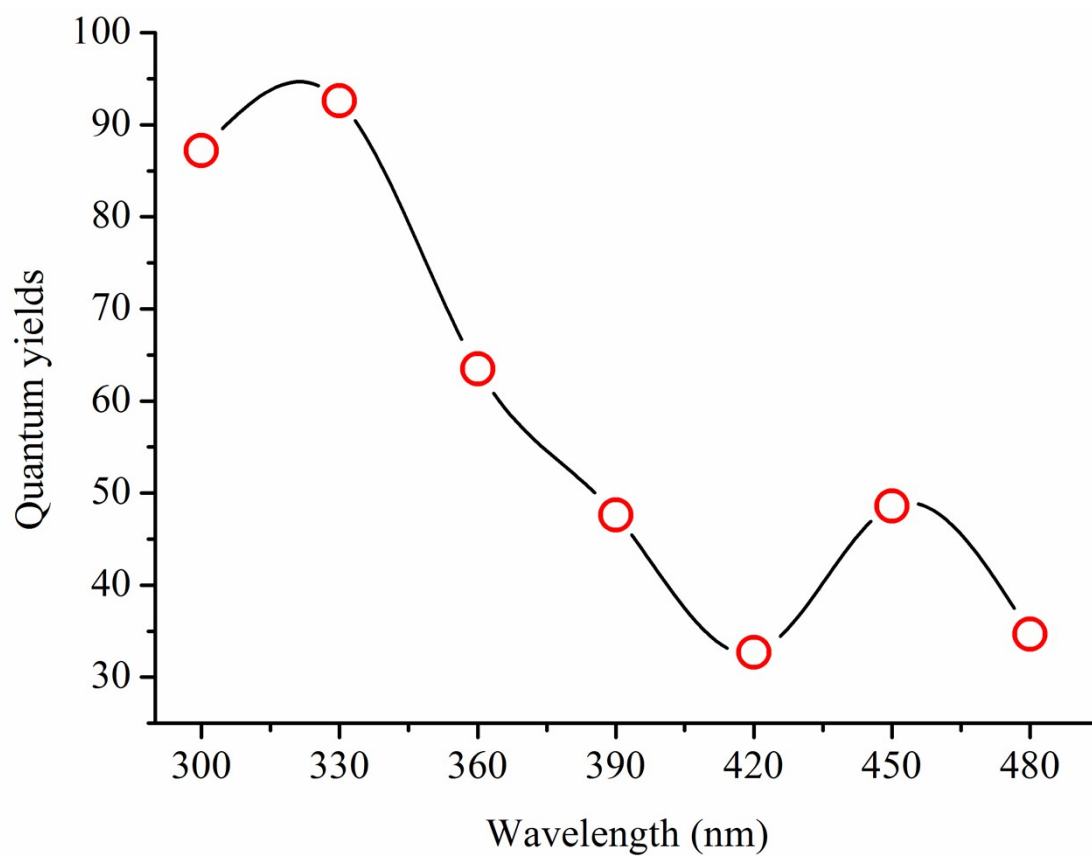

Figure S1. Absolute quantum yields of the  $\text{Ca}_{14}\text{Al}_{10}\text{Zn}_6\text{O}_{35}:\text{Mn}^{4+}$  excited with different wavelength.

Figure S2

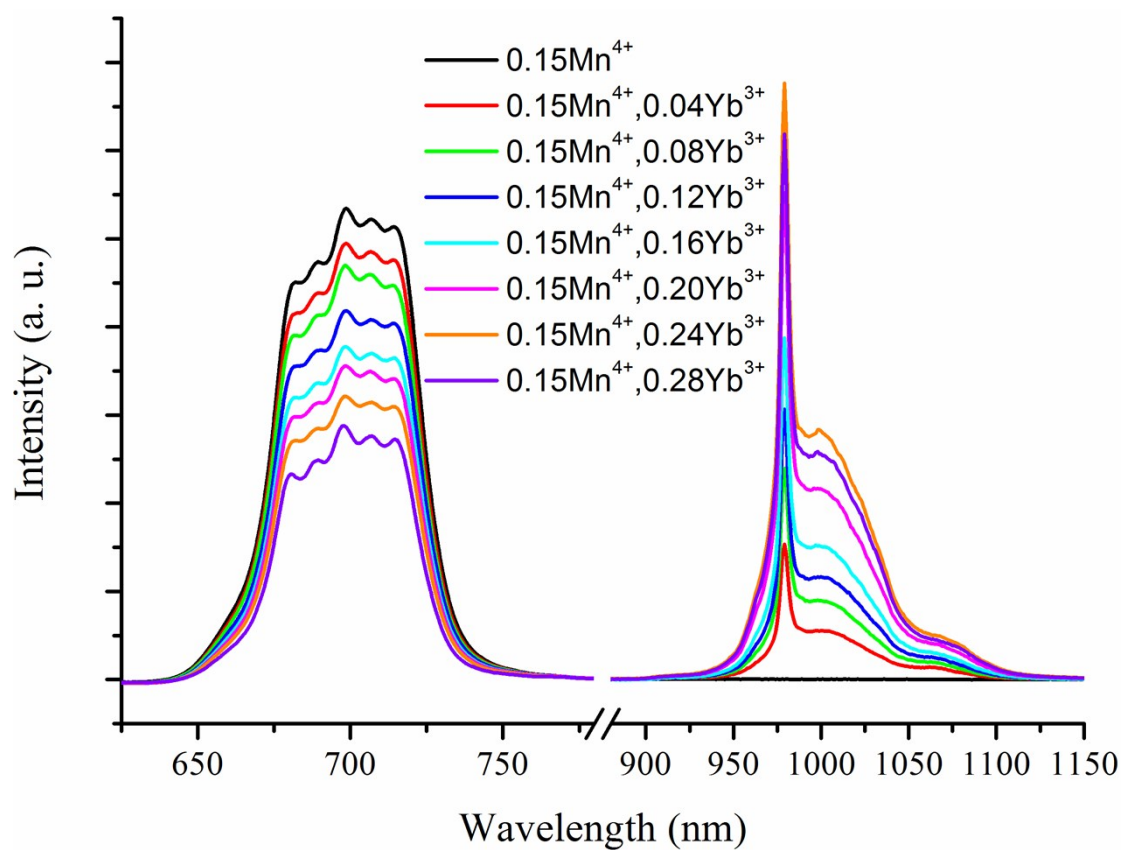

Figure S2. PL spectra of CAZO:Mn<sup>4+</sup>,xYb<sup>3+</sup> phosphors with different Yb<sup>3+</sup> concentrations under the excitation at 460 nm.
